# Supplementary material
Source: MDPI journal article supplement (https://www.mdpi.com/2073-4352/10/10/907)
Supplement: s1 [file s1]

## Supplementary materials:

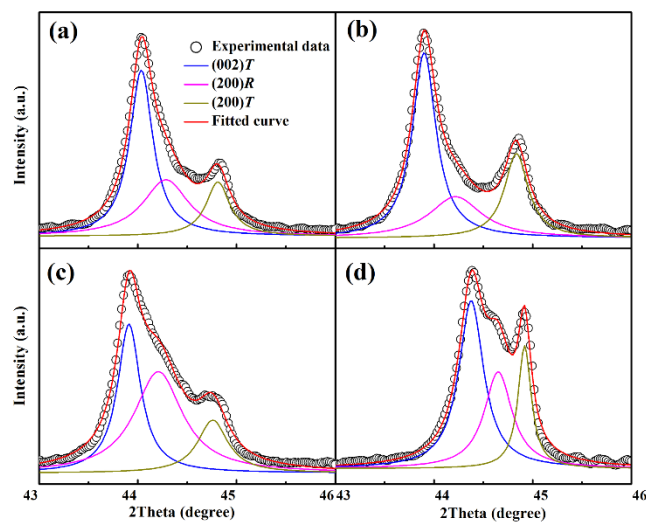

Fig. S1. Comparison of (002)*T*, (200)*R*, and (200)*T* reflections (from left to right) for the hard and soft PZT ceramics: (a) P4, (b) P8, (c) P5, and (d) P5H.
